# Supplementary material
Source: publisher figshare collection journal article supplement (https://acs.figshare.com/ndownloader/files/4504336)
Supplement: Supplementary file 1 [file 4504336]

Supporting information for the manuscript:

Transport of copper oxychloride-based fungicide particles in  
saturated quartz sand

*Paradelo, M.<sup>a</sup>, Šimůnek, J.<sup>b</sup>, Novoa-Muñoz, J.C.<sup>a</sup>, Arias-Estevez, M.<sup>a</sup>, J. Eugenio Lopez-Periogo<sup>a\*</sup>*

<sup>a</sup>Soil Science Group, Department of Plant Biology and Soil Science, Faculty of Sciences, University of Vigo, E-32004 Ourense, Spain.

<sup>b</sup>Department of Environmental Sciences, University of California Riverside, Riverside, CA, USA

\* Corresponding author phone: +34 988 387 070; fax: +34 988 387 001, e-mail: [edelperi@uvigo.es](mailto:edelperi@uvigo.es)

Number of pages: 3

Number of figures: 2

Number of tables: 0

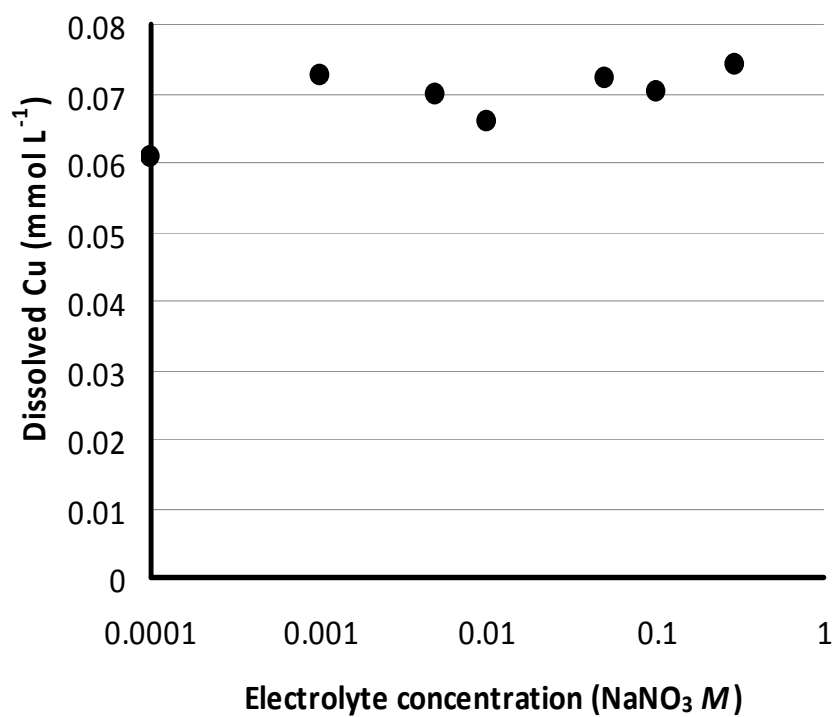

Figure S1: Activity of  $\text{Cu}^{+2}_{\text{aq}}$  as a function of electrolyte added ( $\text{NaNO}_3$ ) in suspensions of COF (4 g  $\text{L}^{-1}$ ), measured by using a selective electrode after 24 h of incubation at 298 K.

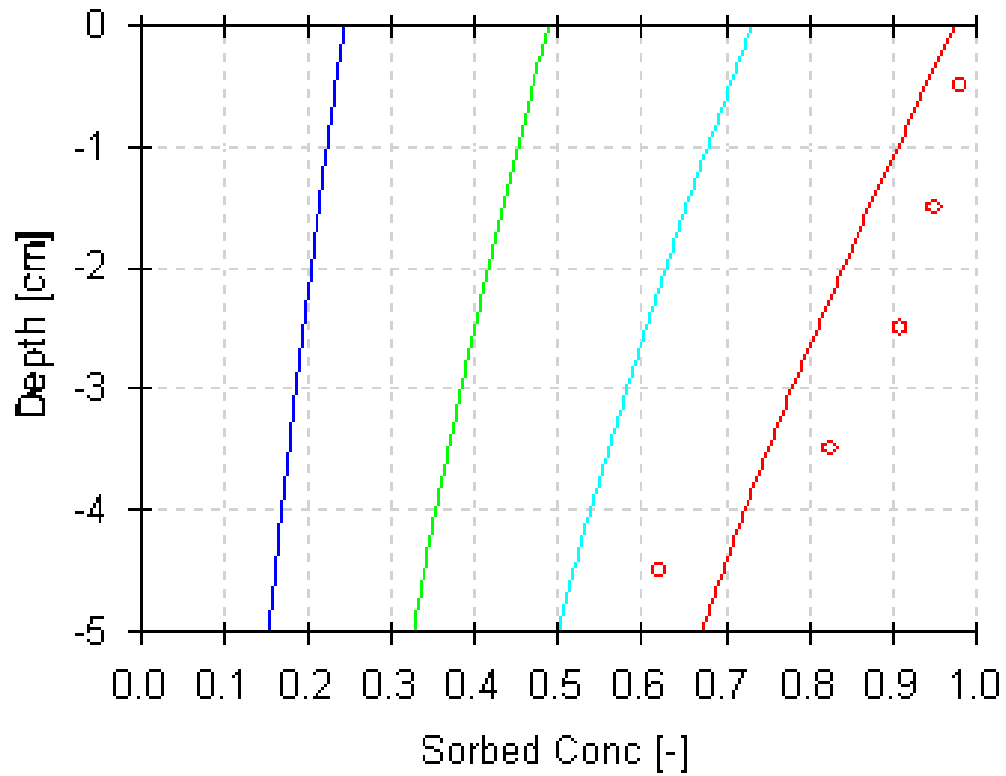

Figure S2. Hydrus-1D output showing concentration profiles obtained using the best-fit parameters for an experiment, in which a suspension of COF in deionized water  $4 \text{ g L}^{-1}$  was percolated (experimental BTC is shown in Figure 2 on the main text). Symbols represent measurements at the end of the experiment. The red line represents the calculated profile at the time the observed profile was measured; other lines correspond to earlier times.
